# Supplementary material
Source: PubMed Central journal article supplement (PMC4160763)
Supplement: ml500255j_si_001.pdf [file ml500255j_si_001.pdf]

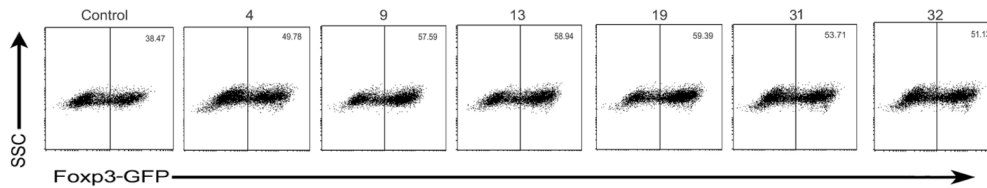

Figure S1. Six compounds increased Treg cells percentage in T cell differentiation marked by Foxp3.

Naive CD4<sup>+</sup> T cells sorted from B6 Foxp3-GFP mice were cultured with or without compounds [the concentration is 100 nM (compounds 1-23) or 1  $\mu$  M (compounds 24-34)] in the absence or presence of TGF- $\beta$  (5 ng/mL) for 3 days. The increased percentage of Foxp3 was analyzed by flow cytometry. One typical staining of three independent experiments was shown. SSC=side-scatter.

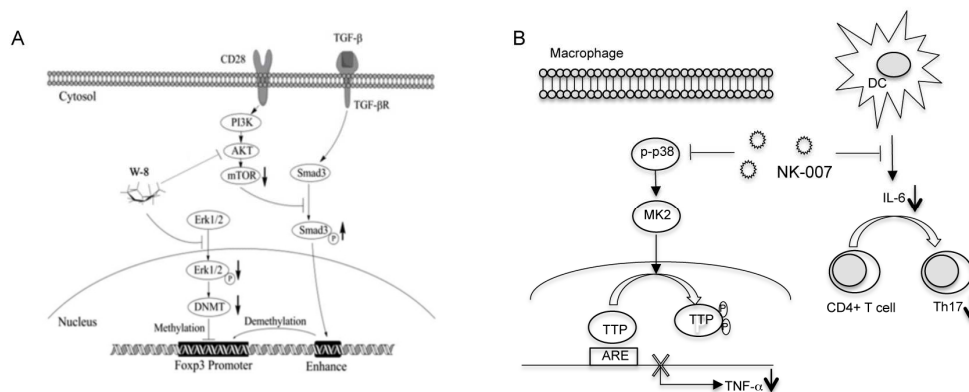

Figure S2. Anti-inflammatory mechanisms of compounds 31 (W-8) and 18 (NK-007) were summarized.

The anti-inflammatory mechanisms of 31 (W-8) and 18 (NK-007) demonstrated in our recently works were summarized to facilitated understanding in these DCB-3503 derivatives.

## Experimental Procedures.

**Mice.** Male C57BL/6 or BALB/c mice (body weight 18-22 g) were purchased from Vital River laboratory Animal Technology Co.. All mice were fed with standard food and received humane care in accordance with the animal care provision. Ethics Statement: All experimental procedures and treatments using animals (mice) were

approved by the Institutional Animal Care and Use Committee at College of Life Sciences of Nankai University, permit number (2012-1179). All surgeries were performed under sodium pentobarbital anesthesia.

**Materials.** Anti-mouse CD3 mAb (clone 145-2C11), anti-mouse CD28 mAb (clone PV1) were from Sungene (Tianjin, P.R. China). Recombinant mouse (rm) IL-2 and TGF- $\beta$  were purchased from R&D Systems (Minneapolis, MN). LPS (Escherichia coli serotype 0111:B4), MTT were obtained from Sigma (St. Louis, MO). Mouse TNF- $\alpha$  ELISA kit was purchased from Biolegend (San Diego, CA).

**Cell Culture.** Murine splenocytes or CD4<sup>+</sup> T cells were maintained in RPMI 1640 (HyClone, Logan, UT) containing 10% FBS, 100 units/mL penicillin and streptomycin (Gibco, Renfrewshire, UK); Raw 264.7 murine macrophages (ATCC, Rockville, MD, USA) were grown in DMEM (HyClone, Logan, UT) containing 10% FBS, 100 units/mL penicillin, and 100  $\mu$ g/mL streptomycin at 37°C in a 5% CO<sub>2</sub> humidified atmosphere.

**Chemistry.** Reagents were purchased from commercial sources and used as received. All anhydrous solvent were dried and purified by standard techniques just before use. Reaction progress was monitored by thin-layer chromatography on silica gel GF-254 with detection by UV. Melting points were determined on an X-4 binocular microscope melting point apparatus (Beijing Tech Instruments Co., Beijing, China) and the

thermometer was uncorrected.  $^1\text{H}$  NMR spectra were obtained by using Bruker AC-P 400 spectrometers. Chemical shift values ( $\delta$ ) were given in ppm and were downfield from internal tetramethylsilane.  $^{13}\text{C}$  NMR spectra were recorded by using Bruker AV 400 (100 MHz) with  $\text{CDCl}_3$  or  $\text{DMSO-}d_6$  as a solvent. Chemical shifts ( $\delta$ ) were reported in parts per million using the solvent peak. High-resolution mass spectra were obtained with an FT-ICR MS spectrometer (Ionspec, 7.0 T).

**Synthetic Procedure for 2,3,6,7-Tetramethoxyphenanthrene-9-carbaldehyde (36).**

The mixture of alcohol **35**<sup>20</sup> (5 g, 15.23 mmol), silica (10 g) and pyridiniumchlorochromate (PCC, 9.85 g, 45.69 mmol) in  $\text{CH}_2\text{Cl}_2$  (150 mL) was stirred at room temperature for 10 h, and then filtered. The filtrate was concentrated by rotary evaporation and purified by flash column chromatography to give compound **36** (4.02 g, 80%) as a yellow powder: mp 227–228 °C (lit.<sup>21</sup> 210–214 °C);  $^1\text{H}$  NMR (400 MHz,  $\text{CDCl}_3$ )  $\delta$  10.27 (s, 1H), 8.98 (s, 1H), 8.07 (s, 1H), 7.80 (s, 1H), 7.78 (s, 1H), 7.35 (s, 1H), 4.17 (s, 3H), 4.14 (s, 3H), 4.11 (s, 3H), 4.07 (s, 3H).

**Synthetic Procedure for Methyl**

**6-(((2,3,6,7-tetramethoxyphenanthren-9-yl)methyl)amino)hexanoate (32).**

The mixture of aldehyde **36** (1.2 g, 3.68 mmol),  $\text{Et}_3\text{N}$  (0.42 g, 4.12 mmol), AcOH (5 d) and methyl 6-aminohexanoate hydrochloride (0.74 g, 4.05 mmol) in  $\text{CH}_2\text{Cl}_2$  (40 mL) was refluxed for 6 h. The solution was cooled to room temperature and concentrated *in vacuo*. The result solid was dissolved in MeOH (30 mL), followed addition of AcOH (5

d) and NaBH<sub>3</sub>CN (0.47 g, 7.40 mmol). The solution was stirred at room temperature for 3 h, and concentrated *in vacuo*. To the result mixture was added CH<sub>2</sub>Cl<sub>2</sub> (30 mL), H<sub>2</sub>O (20 mL) and saturated NaHCO<sub>3</sub> solution (10 mL), and the two layers were separated. The organic phase was dried over anhydrous Na<sub>2</sub>SO<sub>4</sub>, filtered, concentrated and purified by flash column chromatography to give compound **32** (1.14 g, 68%) as a yellow powder: mp: 104–106 °C; <sup>1</sup>H NMR (400 MHz, CDCl<sub>3</sub>) δ 7.75 (s, 1H), 7.67 (s, 1H), 7.58 (s, 1H), 7.42 (s, 1H), 7.18 (s, 1H), 4.16 (s, 2H), 4.08 (s, 3H), 4.07 (s, 3H), 4.06 (s, 3H), 4.02 (s, 3H), 3.64 (s, 3H), 2.79 (t, *J* = 8.0 Hz, 2H), 2.28 (t, *J* = 8.0 Hz, 2H), 1.71–1.65 (m, 2H), 1.64–1.57 (m, 2H), 1.40–1.33 (m, 2H); <sup>13</sup>C NMR (100 MHz, CDCl<sub>3</sub>) δ 174.1, 149.3, 149.0, 148.9, 148.8, 130.1, 126.0, 125.1, 125.0, 124.8, 124.3, 108.3, 104.7, 103.4, 102.8, 56.1, 56.0, 56.0, 55.9, 51.7, 51.5, 49.2, 33.9, 29.2, 26.8, 24.7; ESI-HRMS (*m/z*): calcd. for C<sub>26</sub>H<sub>33</sub>NO<sub>6</sub>Na [M+Na]<sup>+</sup> 478.2200; found 478.2208.

### **Foxp3-GFP<sup>+</sup> cells detection assay**

Naïve CD4<sup>+</sup> T cells isolated from spleen of C57BL/6 Foxp3-GFP transgenic mice were treated with anti-CD3 and anti-CD28 in the presence of IL-2 (20 ng/mL) and TGF- $\beta$  (5 ng/mL) to induce expression of Foxp3. All these 34 compounds were added to the culture with concentration of 100 nM for 3 days, and cells were then used for GFP detection by flow cytometry (FACS calibur (BD)) upon gating on CD4<sup>+</sup> T cells. Promoting ratio was calculated as the following formula: (GFP<sup>+</sup> cell percentage of compound treated - GFP<sup>+</sup> cell percentage of vehicle control) / GFP<sup>+</sup> cell percentage of vehicle control  $\times$  100%.

### **TNF- $\alpha$ detection assay**

Splenocytes were isolated from BALB/c mice and suspended in 1640 with 10% FBS. Cells were added to 96-microwell plates coated with different compounds for 2 h prior to LPS (100 ng/mL) stimulation. Supernatants were collected at 4 or 24 h post culture and frozen at -20°C until analysis. Raw 264.7 cells were grown in DMEM supplemented with 10% FBS and these compounds were added 2 hours prior to LPS stimulation. Supernatants were collected at 6 hours after LPS treatment and stored at -20°C until analysis. TNF- $\alpha$  level in the supernatants was measured by ELISA. Inhibition percentage was calculated as the following formula:  $(\text{TNF-}\alpha \text{ level of vehicle control} - \text{TNF-}\alpha \text{ level of compound treated}) / \text{TNF-}\alpha \text{ level of vehicle control} \times 100\%$ .

### **Cell Survival assay**

Cell survival rate was evaluated by a microculture tetrazolium assay using MTT. Briefly, cells were added to 96-microwell flat-bottom plates with different compounds or DMSO control for 2 h prior to LPS stimulation. After 48 h, 50uL of MTT stock solution (2 mg/mL in PBS) was added to 150uL cell cultures for 4 h incubation at 37°C. Plates were then centrifuged and culture medium was removed. Precipitated formazan was dissolved in 150uL DMSO. Results were read within 15 min in a spectrometer at 570 nm, and the means of triplicates were calculated. Cell survival rate is expressed as cell viability percentage of control samples and was calculated as the following formula:  $(\text{cell numbers of compound treated} / \text{cell numbers of vehicle control}) \times 100\%$ . The

inhibitory concentration (IC50) was calculated using Graphpad Prism.

### **Statistic**

All offline data were measured by investigators blinded to treatment. Results were presented as Mean  $\pm$  SD. Significant statistical difference was defined at  $P < 0.05$ . The SPSS 13.0 software package was used for statistical analysis. An independent 2-sample Student's t-test was used to compare all experimental measurements. Throughout the text, figures, and legends, the following terminology is used to show statistical significance: \* $P < 0.05$ , \*\*  $P < 0.01$ , \*\*\*  $P < 0.001$ .
